# Supplementary material for: N-Ion-implanted TiO2 photoanodes in quantum dot-sensitized solar cells
Source: Royal Society of Chemistry journal article supplement (doi:10.1039/c2nr11953f), 2012-01-01
Supplement: c2nr11953f.pdf [file c2nr11953f.pdf]

## Supporting information

# N-ion-implanted TiO<sub>2</sub> photoanodes in quantum dot-sensitized solar cells

P. Sudhagar,<sup>a</sup> K.Asokan,<sup>b</sup> E. Ito,<sup>c</sup> Yong Soo Kang<sup>\*a</sup>

E-Mail: [kangys@hanyang.ac.kr](mailto:kangys@hanyang.ac.kr)

### S1. Estimation of N ion implantation depth profile in TiO<sub>2</sub> lattice

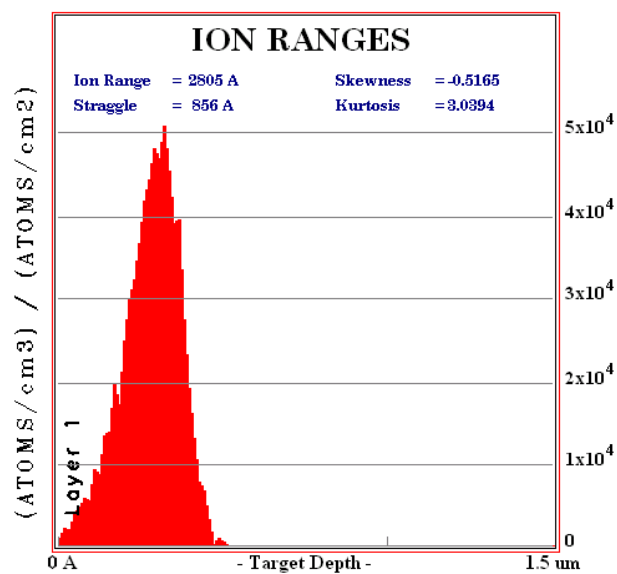

**Fig. S1.** SRIM2008 simulation of the depth profile of the implanted N atoms for N-H-TiO<sub>2</sub> electrode.

## S2. XPS survey

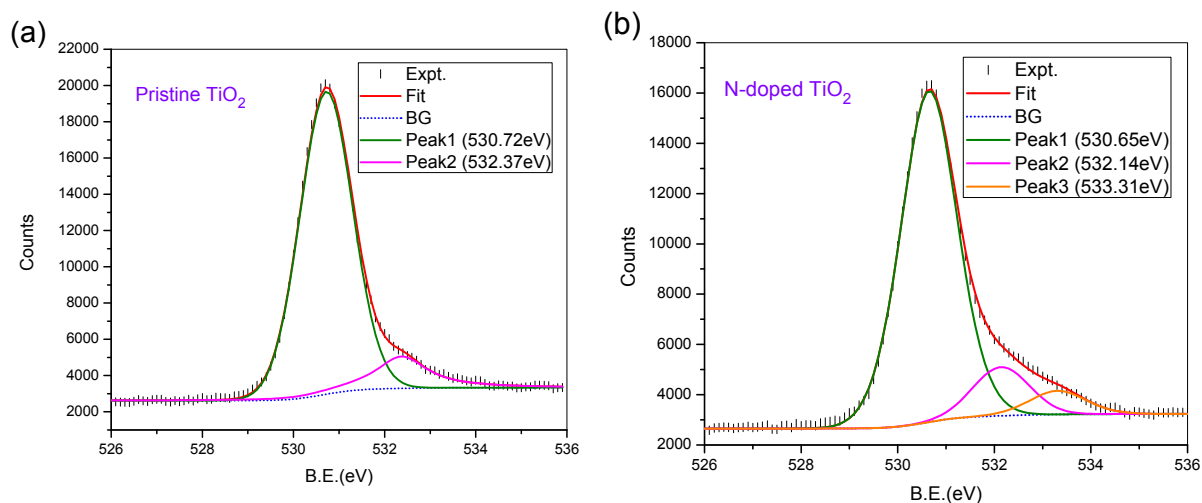

**Fig. S2.** O1s core level spectra of pristine and N ion implanted TiO<sub>2</sub>

**Table S1.** Peak positions of Ti2p and O1s estimated from XPS spectra.

| Sample             | Ti2p <sub>3/2</sub> (eV) | O1 <sub>s</sub> (main) (eV) | O1 <sub>s</sub> (shoulder) (eV) |
|--------------------|--------------------------|-----------------------------|---------------------------------|
| TiO <sub>2</sub>   | 459.5                    | 530.7                       | 532.4 -                         |
| N-TiO <sub>2</sub> | 459.3                    | 530.7                       | 532.1 533.3                     |

Fig.S2 displays the O1s core level spectra of TiO<sub>2</sub> and N-TiO<sub>2</sub> samples. From Fig.S2 it observed that intensity of O1s main feature at 530.7 eV decreased by N ion implantation which endorse the occupancy of N ions in the oxygen vacancies. On the other hand feature at around 533 eV seems to slightly increase may due to OH group adsorption assumed as surface contamination.

### **S3. Optical absorption of QDs sensitized electrodes**

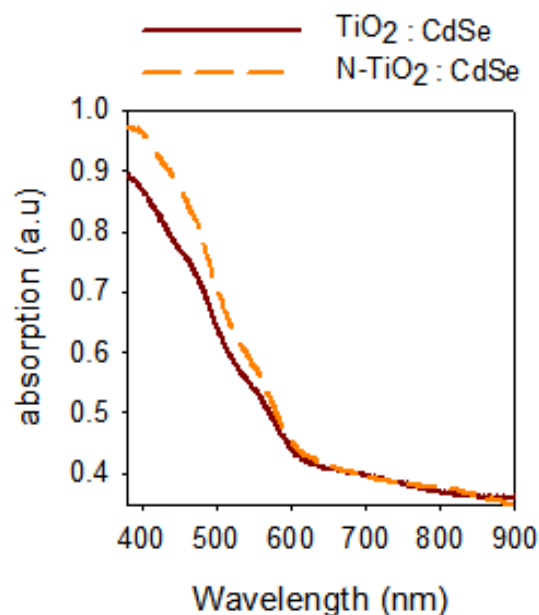

**Fig. S3.** Optical absorption spectra of CdSe QDs sensitized H-TiO<sub>2</sub> electrodes.

Fig. S3. Illustrates the absorption spectra of CdSe sensitized electrodes. From Fig.S3 the absorption onset is observed around at 580-600nm which reflects the CdSe band gap nature. Under similar CdSe sensitization conditions, the N- TiO<sub>2</sub> electrode show higher absorption than that of the TiO<sub>2</sub>. We claim that the visible light is apparently improvement by synergetic contributing from N ion implantation associate with CdSe QDs.

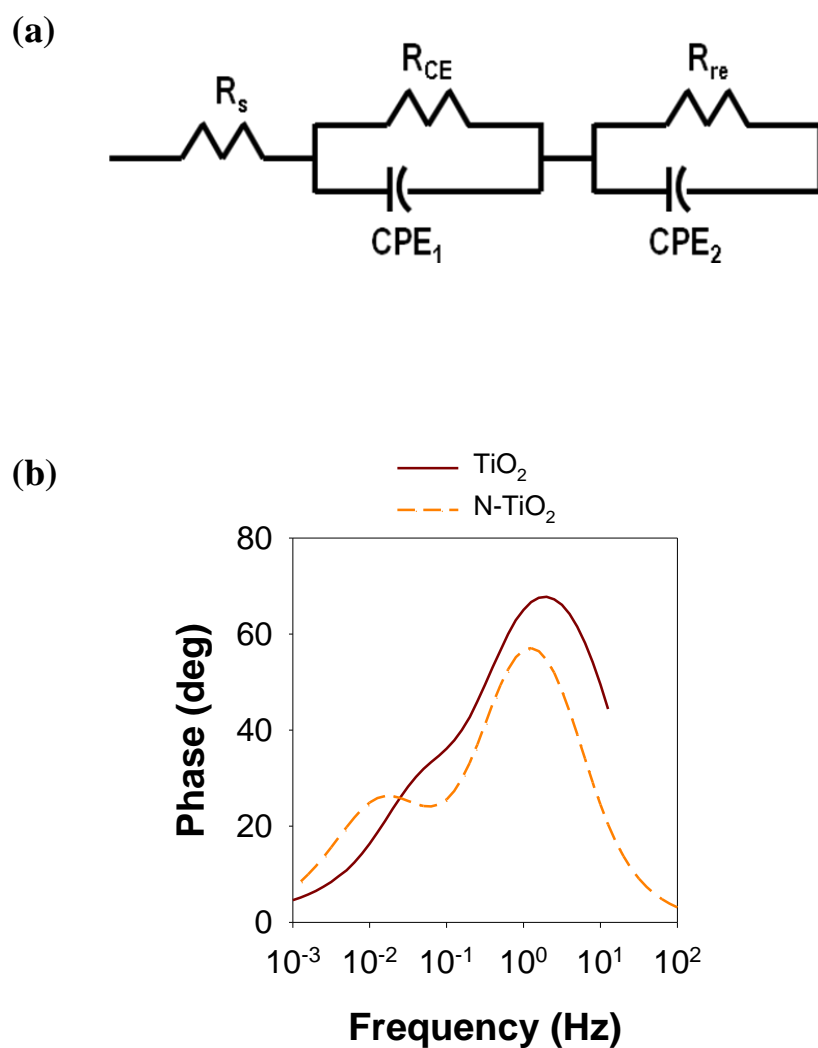

**Fig. S4.** (a) Equivalent circuit for impedance data analysis and (b) Bode characteristic plots of QDSCs with different photoanodes.
